# Supplementary material for: A Longitudinal 1H NMR-Based Metabolic Profile Analysis of Urine from Hospitalized Premature Newborns Receiving Enteral and Parenteral Nutrition
Source: MDPI journal article supplement (doi:10.3390/metabo12030255), 2022-03-17
Supplement: s1 [file s1]

## Article

# A Longitudinal $^1\text{H}$ NMR-Based Metabolic Profile Analysis of Urine from Hospitalized Premature Newborns Receiving Enteral and Parenteral Nutrition

Nuria Esturau-Escofet <sup>1,†</sup>, Eduardo Rodríguez de San Miguel <sup>2,†</sup>, Marcela Vela-Amieva <sup>3,†</sup>, Martha E. García-Aguilera <sup>1</sup>, Circe C. Hernández-Espino <sup>1</sup>, Luis Macías-Kauffer <sup>4</sup>, Carlos López-Candiani <sup>5</sup>, José J. Naveja <sup>1</sup> and Isabel Ibarra-González <sup>6,\*</sup>

## Supplementary material

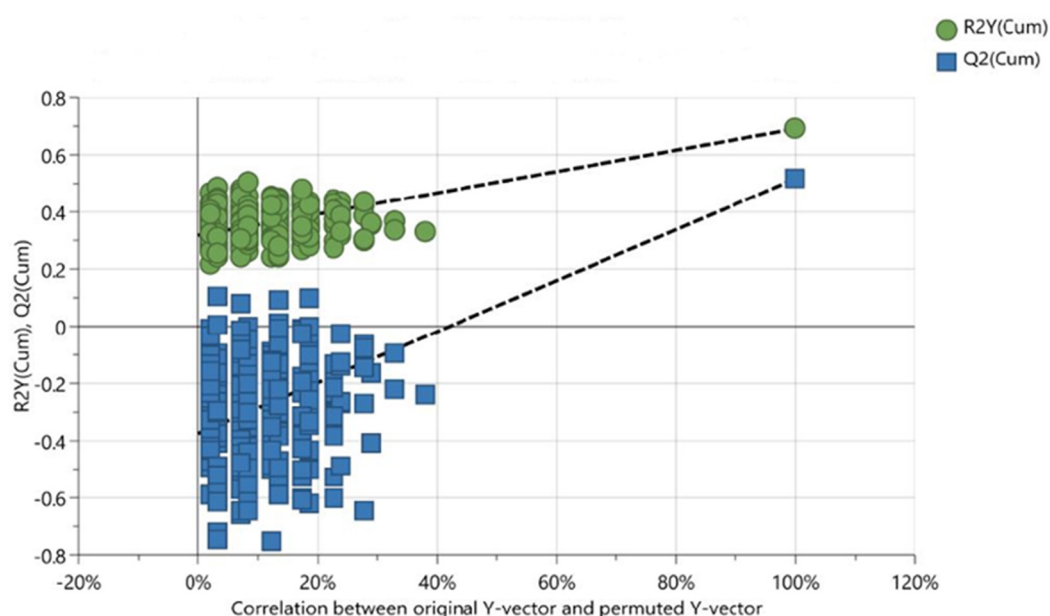

**Supplementary Figure S1.** Permutation test conducted with 300 randomly initiated permutations showing R2 (green circles) and Q2 (blue squares) values from the permuted analysis (left-bottom corner) and the associated PLS-DA model values (right-top corner). Intercepts: R2 = (0.0, 0.318), Q2 = (0.0, -0.374).

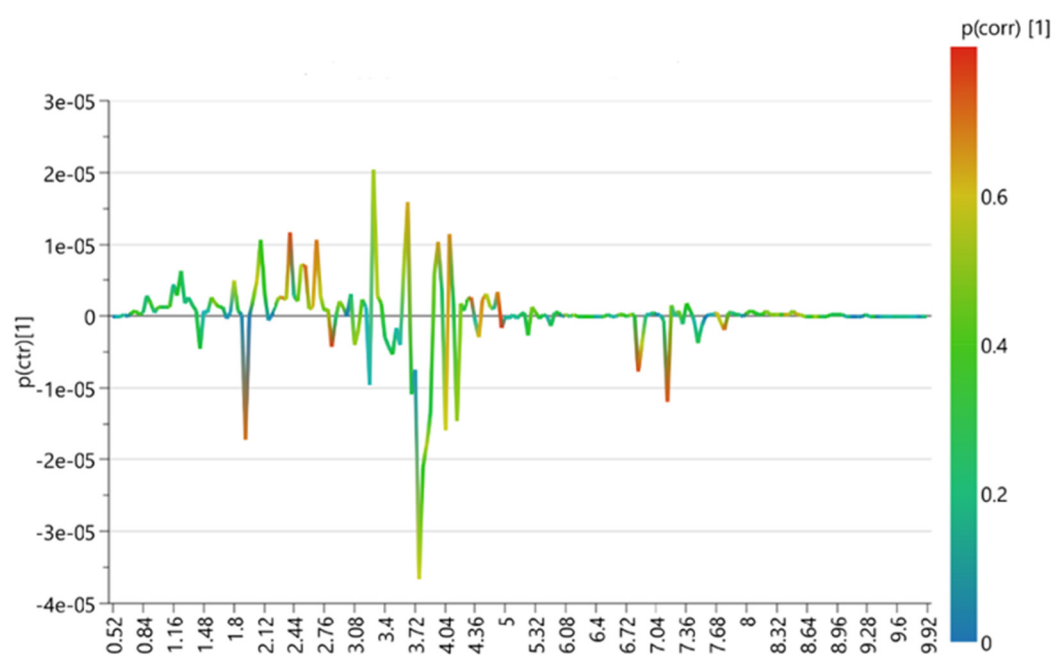

**Supplementary Figure S2.** S-line plot showing the predictive loadings ( $p(ctr)[1]$ ) as a function of the original variables (ppm) colored according to the absolute value of the correlation loadings ( $p(corr)[1]$ ).

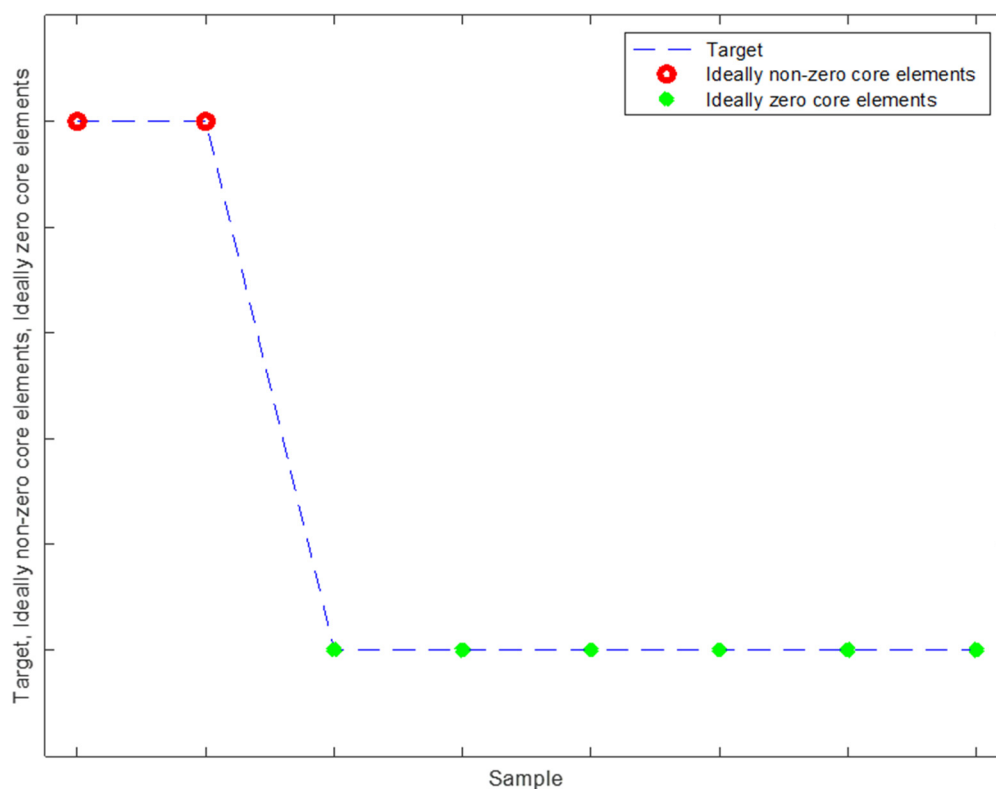

**Supplementary Figure S3.** Core consistency plot of the PARAFAC-2 model.

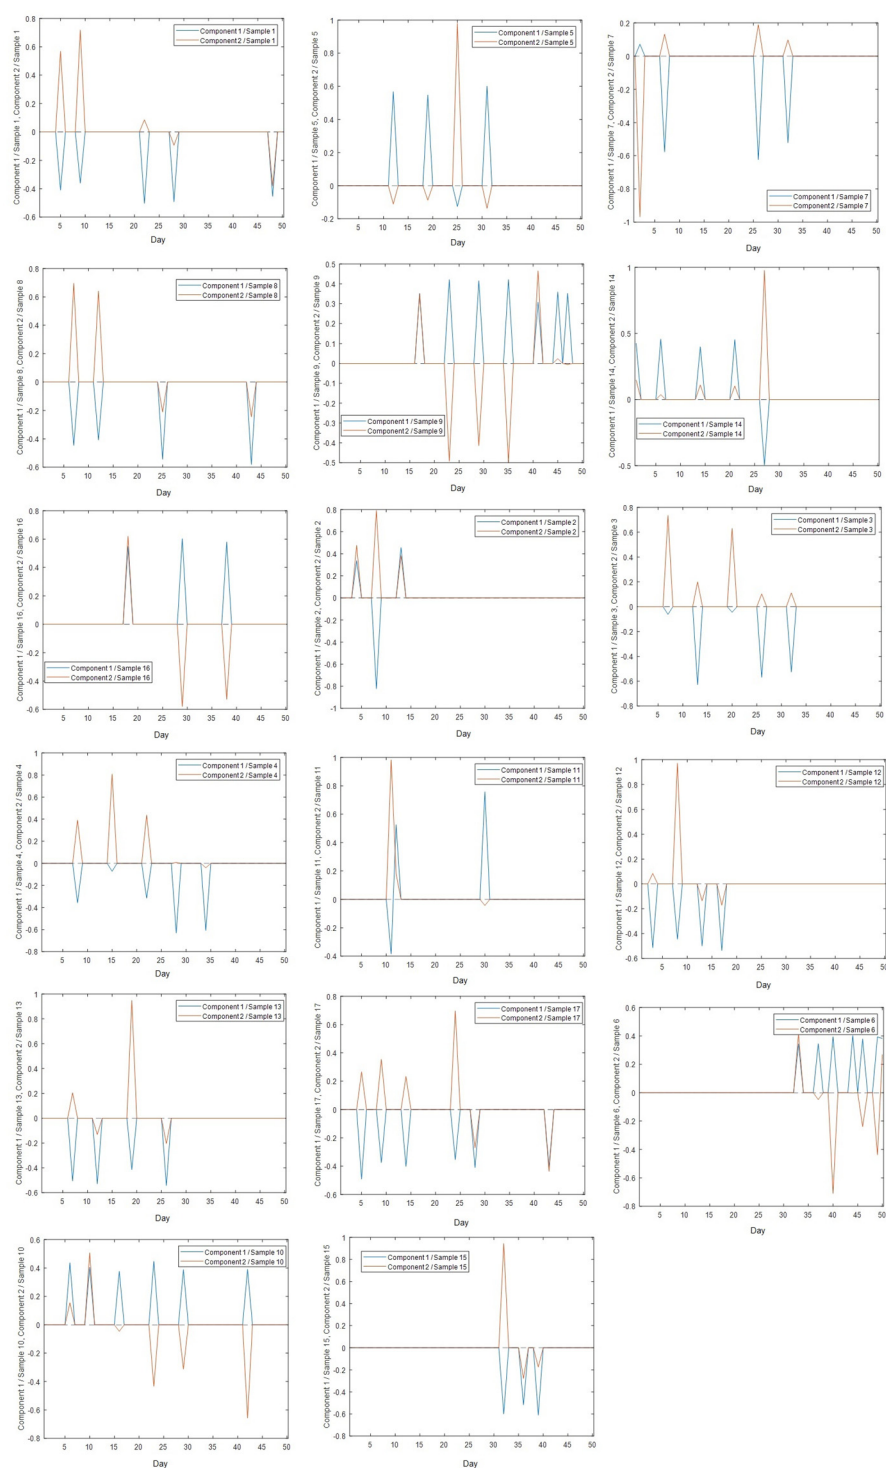

**Supplementary Figure S4.** Loading plot (loadings vs. time) of the first mode (time) in the PARAFAC-2 model. Two factors (blue and orange) are represented among 17 subjects.

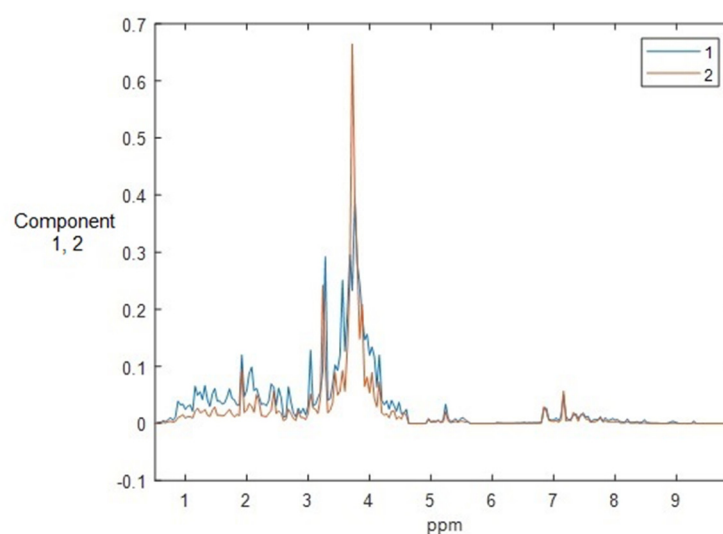

**Supplementary Figure S5.** Loading plot (loadings vs. chemical shifts) of the second mode (spectra) in the PARAFAC-2 model. Two factors (blue and orange) are represented according to their related chemical shifts.

**Supplementary Table S1.** Detailed results from the pathway analysis.

| Pathway Name                                 | Total | Hits | p        | -log (p) | Impact |
|----------------------------------------------|-------|------|----------|----------|--------|
| Galactose metabolism                         | 27    | 2    | 0.009760 | 2.011    | 0.1632 |
| Citrate cycle (TCA cycle)                    | 20    | 2    | 0.005396 | 2.268    | 0.1231 |
| Pentose phosphate pathway                    | 22    | 1    | 0.121020 | 0.917    | 0.0471 |
| Glyoxylate and dicarboxylate metabolism      | 32    | 1    | 0.171590 | 0.766    | 0.0318 |
| Glycolysis/Gluconeogenesis                   | 26    | 1    | 0.141570 | 0.849    | 0.0002 |
| Alanine, aspartate, and glutamate metabolism | 28    | 2    | 0.010479 | 1.980    | 0      |
| Butanoate metabolism                         | 15    | 1    | 0.084009 | 1.076    | 0      |
| Propanoate metabolism                        | 23    | 1    | 0.126200 | 0.899    | 0      |
| Amino sugar and nucleotide sugar metabolism  | 37    | 1    | 0.195890 | 0.708    | 0      |
| Valine, leucine, and isoleucine degradation  | 40    | 1    | 0.210160 | 0.677    | 0      |

Total is the number of all compounds in the pathway; Hits is the matched number of metabolites from the uploaded data; p is the original p value calculated from enrichment analysis; and the impact value is calculated from topology analysis.

**Supplementary Table S2.** ANOVA results of comorbidities for each NT group.

|                      | SS                     | DF | MS                     | F (DFn, DFd)                        | P value  |
|----------------------|------------------------|----|------------------------|-------------------------------------|----------|
| Comorbidities Factor | 2370                   | 17 | 139.4                  | F (17, 17) = 3.919                  | P=0.0037 |
| NT Factor            | 2.25x10 <sup>-16</sup> | 1  | 2.25x10 <sup>-16</sup> | F (1, 17) = 6.325x10 <sup>-18</sup> | P>0.9999 |
| Residual             | 604.8                  | 17 | 35.58                  |                                     |          |

**Supplementary Table S3.** Characteristics of the PN used in the studied preterm newborns.

|                                                     |                                                                                                    |                                                                                                                                                                                                                                                                                                                                                                                                                                                                                                                                                              |
|-----------------------------------------------------|----------------------------------------------------------------------------------------------------|--------------------------------------------------------------------------------------------------------------------------------------------------------------------------------------------------------------------------------------------------------------------------------------------------------------------------------------------------------------------------------------------------------------------------------------------------------------------------------------------------------------------------------------------------------------|
| Proteins<br>1 g= 4 kcal<br>Doses: 4 g/kg            | Pediatric amino acids 10%, LE-VAMIN® PAD, Pisa® Farmaceutica, Mexico.                              | Each 100 ml contains:<br>Essential amino acids:<br>L-Isoleucine 820.0 mg; L-Leucine 1400.0 mg; L-Lysine 850.0 mg; L-Methionine 340.0 mg; L-Phenylalanine 480.0 mg; L-Threonine 420.0 mg; L-Tryptophan 200.0 mg; L-Valine 780.0 mg; L-Cysteine 16.0 mg; L-Histidine 480.0 mg; L-Tyrosine 240.0 mg.<br>Nonessential amino acids:<br>L-Alanine 540.0 mg; L-Arginine 1200.0 mg; L-Proline 680.0 mg; L-Serine 380.0 mg; Glycine 360.0 mg; L-Aspartic Acid 320.0 mg; L-Glutamic Acid 500.0 mg<br>L-Taurine 25.0 mg; Sodium metabisulfite (preservative) < 50.0 mg. |
|                                                     |                                                                                                    | Approximate number of electrolytes:<br>Sodium 5 mEq/L<br>Chloride < 3 mEq/L<br>Acetate 97 mEq/L<br>Osmolarity: 909 mOsmol/L                                                                                                                                                                                                                                                                                                                                                                                                                                  |
| Carbohydrates<br>1 g= 3.44 kcal<br>Doses: 17.2 g/kg | Glucose anhydrous 50%<br>SOLUCION DX-50 PISA® Farmaceutica, Mexico.                                | Each 100 ml contains:<br>Glucose 50 g<br>Water for injection 100 ml.                                                                                                                                                                                                                                                                                                                                                                                                                                                                                         |
| Lipids<br>1 g= 10 kcal<br>Doses: 3.5 g/kg           | Medium and long-chain fatty acids, LIPOFUNDIN ®MCT/LCT, PISA® Farmaceutica, Mexico                 | Each 100 ml contains:<br>Soybean oil 10.0 g; Medium chain triglycerides (MCT) 10.0 g.<br>Phosphate equivalent: 14.5 mmol/L<br>Caloric content: 7990 (1908) kJ/L (kcal/L)<br>Approximate osmolarity: 380 mOsm/L                                                                                                                                                                                                                                                                                                                                               |
|                                                     | Soybean oil, olive, fish oil, oil, medium chain triglycerides, SMOF-lipid®, Fresenius Kabi Mexico. | Every 100 ml contains<br>Refined soybean oil 6.0 g; Medium chain triglycerides 6.0 g;<br>Refined olive oil 5.0 g; Fish oil rich in omega-3 acids 3.0 g.<br>Total energy input: 8.4 MJ/l (= 2000 Kcal/l)<br>Osmolality approx: 380 mOsmol/kg.                                                                                                                                                                                                                                                                                                                 |
| Multivitamin<br>3 ml                                | Pediatric Multivitamin, VITA-FUSIN®, PISA® Farmaceutica, Mexico.                                   | 1 ampoule of 5 ml contains<br>Vitamin C: 80 mg; Folic acid: 0.140 mg; Biotin: 0.020 mg; Vitamin B12: 0.001 mg; Pantothenic acid: 5.0 mg; Vitamin B2: 1.4 mg; Niacinamide: 17 mg; Vitamin B6: 1.0 mg; Vitamin B1: 1.2 mg; Retinol or Vitamin A: 2000 IU; Vitamin D3: 200 IU; Vitamin E: 7 IU; Vitamin K1: 0.2 mg.                                                                                                                                                                                                                                             |
| Trace elements<br>0.3 ml/kg                         | Tracefusin®, PISA® Farmaceutica, Mexico.                                                           | Every 100 ml contains: Zinc chloride 55.00 mg; Cupric sulphate pentahydrate 16.90 mg; Manganese sulphate 38.10 mg; Sodium iodide 1.30 mg; Sodium fluoride 14.00 mg; Sodium chloride 163.90 mg.                                                                                                                                                                                                                                                                                                                                                               |
| Glutamine<br>0.3 g/kg                               | Alanine and Glutamine, DIPEPTIVEN®, Fresenius Kabi Mexico.                                         | Each 100 ml contains: N(2)-L-alanyl-L-glutamine (equivalent to 8.20 g of L-alanine, and 13.46 g of L-glutamine) 20.0 g.<br>Theoretical osmolarity 921 mOsmol/l                                                                                                                                                                                                                                                                                                                                                                                               |
| Carnitine<br>5 mg                                   | EFE-CARN®, PISA® Farmaceutica, Mexico.                                                             | Each ampoule 5 ml contains: 1 g L-carnitine.                                                                                                                                                                                                                                                                                                                                                                                                                                                                                                                 |
| Zinc<br>100 microg/kg                               | ZN-FUSIN®, PISA® Farmaceutica, Mexico.                                                             | Each ml contains: Zinc sulphate heptahydrate, equivalent to 1 mg of elemental zinc.                                                                                                                                                                                                                                                                                                                                                                                                                                                                          |

**Supplementary Table S4.** Characteristics of the EN used in the studied preterm newborns.

| <b>Enfamil Prematuros Pre-mium®, Mead Johnson®, Mexico</b> | <b>Per 100 kcal</b> | <b>Per 100 g, power</b> | <b>24 kcal/30 ml (81 kcal/100 ml)</b> |
|------------------------------------------------------------|---------------------|-------------------------|---------------------------------------|
| Energy, KJ (kcal)                                          | 427 (100)           | 2050 (490)              | 343 (81)                              |
| Protein, g                                                 | 3                   | 14.7                    | 2.4                                   |
| Lipids, g                                                  | 5.1                 | 25                      | 4.1                                   |
| Carbohydrates, g                                           | 11                  | 54                      | 8.9                                   |
| Vitamin A, µg                                              | 150                 | 750                     | 123                                   |
| Vitamin D, µg                                              | 2.5                 | 12.3                    | 3.4                                   |
| Vitamin E, µg                                              | 4.2                 | 21                      | 3.4                                   |
| Vitamin K, µg                                              | 8                   | 39                      | 6.5                                   |
| Thiamine, µg                                               | 200                 | 980                     | 162                                   |
| Riboflavin, µg                                             | 300                 | 1470                    | 240                                   |
| Vitamin B6, µg                                             | 150                 | 740                     | 122                                   |
| Vitamin B12, µg                                            | 0.25                | 1.2                     | 2                                     |
| Niacin, µg                                                 | 4000                | 19600                   | 3200                                  |
| Folic acid, µg                                             | 40                  | 196                     | 32                                    |
| Pantothenic acid, µg                                       | 1200                | 5900                    | 970                                   |
| Biotin, µg                                                 | 4                   | 20                      | 3.2                                   |
| Vitamin C, mg                                              | 20                  | 98                      | 16.2                                  |
| Choline, mg                                                | 18                  | 88                      | 14.6                                  |
| Inositol, mg                                               | 45                  | 220                     | 36                                    |
| Taurine, mg                                                | 6                   | 29                      | 4.9                                   |
| Carnitine, mg                                              | 2                   | 9.8                     | 1.62                                  |
| Calcium, mg                                                | 120                 | 590                     | 97                                    |
| Phosphorus, mg                                             | 66                  | 320                     | 53                                    |
| Magnesium, mg                                              | 9                   | 44                      | 7.3                                   |
| Iron, mg                                                   | 0.5                 | 2.4                     | 0.4                                   |
| Zinc, mg                                                   | 1                   | 4.9                     | 0.81                                  |
| Manganese, µg                                              | 6.3                 | 31                      | 5.1                                   |
| Copper, µg                                                 | 120                 | 590                     | 97                                    |
| Iodine, µg                                                 | 25                  | 123                     | 20                                    |
| Sodium, mg                                                 | 58                  | 284                     | 47                                    |
| Potassium, mg                                              | 100                 | 490                     | 81                                    |
| Chloride, mg                                               | 85                  | 420                     | 69                                    |
| Linoleic acid, mg                                          | 810                 | 4000                    | 660                                   |
| Linolenic acid, mg                                         | 110                 | 540                     | 89                                    |
| Docosahexaenoic acid, mg                                   | 17                  | 83                      | 13.8                                  |
| Arachidonic acid, mg                                       | 34                  | 167                     | 28                                    |
| Selenium, µg                                               | 1.1                 | 5.4                     | 0.9                                   |
